# Supplementary material for: Assessment of Factors Affecting the Implementation of Integrated Management of Neonatal and Childhood Illness for Treatment of under Five Children by Health Professional in Health Care Facilities in Yifat Cluster in North Shewa Zone, Amhara Region, Ethiopia
Source: Hindawi journal article supplement (doi:10.1155/2019/9474612), 2019-12-15
Supplement: f1 [file 9474612.f1.pdf]

## QUESTIONNAIRE

### PART 1: Socio-Demographic related Questionnaires nurses.

All questionnaires are completed anonymously. We would appreciate if you answer all the questions and answer as honestly as possible. Please circle on the number you select that best answers the question. Kindly make only one selection unless otherwise instructed.

| Ser.no | Socio-Demographic      | Response                                                   | Remark |
|--------|------------------------|------------------------------------------------------------|--------|
| 101    | Sex                    | 1. Male 2. Female                                          |        |
| 102    | Age                    | ___in years                                                |        |
| 103    | Religion               | 1. Orthodox 2. Muslim 3. Protestant 4. Other(specify)_____ |        |
| 104    | level of qualification | 1. MSc 2. BSc 3. Diploma 4. Other (specify) _____          |        |
| 105    | Marital status         | 1. Married 2. Single 3. Divorced 4. Widowed 5. Separated   |        |
| 106    | Ethnicity              | 1. Oromo 2. Amhara 3. Sidama<br>4. Other (specify)_____    |        |

### Part 2. Questions related training and factors affecting the implementation the IMCI strategy.

|     |                                                                        |                                                    |  |
|-----|------------------------------------------------------------------------|----------------------------------------------------|--|
| 201 | How long have you been serving as health care provider?                | 1. <5 yrs. 2. 5-10 yrs.<br>3. 10-15 yrs. 4. >15yrs |  |
| 202 | Have you ever worked in a Pediatric/Children ward or under five OPD?   | 1.Yes 2.No                                         |  |
| 203 | If yes to # 202, How long have you been serving in under five clinics? | 1. 0-5 years 2. 6-10yrs<br>3. More than 10         |  |
| 204 | Have you attended IMNCI training?                                      | 1. Yes 2. No                                       |  |
| 205 | 205 If yes to # 204, which IMCI training did you receive?              | 1.pre service training 2.in service                |  |
| 206 | When you last attended training (Year and                              | month_____ year_____                               |  |

|     |                                                                             |                                                                                                                                                                                                                 |  |
|-----|-----------------------------------------------------------------------------|-----------------------------------------------------------------------------------------------------------------------------------------------------------------------------------------------------------------|--|
|     | month of training)?                                                         |                                                                                                                                                                                                                 |  |
| 207 | What was the duration of IMNCI training?                                    | _____days                                                                                                                                                                                                       |  |
| 208 | Have you received IMCI follow-up training?                                  | 1. Yes 2. No                                                                                                                                                                                                    |  |
| 209 | If yes to # 208, When you last attended follow up training IMCI strategy?   | Month -----Year_____                                                                                                                                                                                            |  |
| 210 | What are the main challenges encountered in implementing the IMCI strategy? | 1. Shortage of staff<br>2. Time consuming<br>3. Lack of supplies/resource<br>4. Untrained staff<br>5. Lack of supervision<br><br>6. Lack of knowledge<br><br>7. Lack of good attitude<br>8.Others(specify)----- |  |

**PART.3. Question related to nurses' experience in implementing the IMCI strategy**

**301.** Is IMNCI training considered during the assignment of daily duties to nurses at this health facility? 1. Yes 2. No

| 302   | How often the following case management steps or skills of the IMCI case management process do you find difficult to practice? |        |           |               |
|-------|--------------------------------------------------------------------------------------------------------------------------------|--------|-----------|---------------|
|       |                                                                                                                                | always | sometimes | Not difficult |
| 302.1 | Assess the child's condition                                                                                                   |        |           |               |
| 302.2 | Classify the child's illness                                                                                                   |        |           |               |
| 302.3 | Identify treatment                                                                                                             |        |           |               |
| 302.4 | Treat the child                                                                                                                |        |           |               |
| 302.5 | Counsel the caretaker                                                                                                          |        |           |               |
| 302.6 | Provide follow-up care                                                                                                         |        |           |               |

|        |                                                          |  |  |  |
|--------|----------------------------------------------------------|--|--|--|
| 303    | How often do you perform the following IMNCI activities? |  |  |  |
| 303.1  | Checking for vaccination                                 |  |  |  |
| 303.2  | Checking for danger signs                                |  |  |  |
| 303.3  | Checking for pallor                                      |  |  |  |
| 303.4  | Assessing fever                                          |  |  |  |
| 303.5  | Assessing diarrhea                                       |  |  |  |
| 303.6  | Assessing malaria                                        |  |  |  |
| 303.7  | Assessing cough                                          |  |  |  |
| 303.8  | Weighing the children                                    |  |  |  |
| 303.9  | Checking weight against the chart                        |  |  |  |
| 303.10 | 303.10 Checking for ear problem                          |  |  |  |

|            |                                                                                                    |                |       |         |          |                   |
|------------|----------------------------------------------------------------------------------------------------|----------------|-------|---------|----------|-------------------|
| <b>304</b> | Which of the following statements best describes your management of a sick child at your facility? |                |       |         |          |                   |
| 304.1      | always apply all the stages of the integrated case management process                              |                |       |         |          |                   |
| 304.2      | I apply most of the stages of the integrated case management process                               |                |       |         |          |                   |
| 304.3      | I do not apply any of the stages of the integrated case management process                         |                |       |         |          |                   |
| 305        | To what extent do you agree with the following statements?                                         |                |       |         |          |                   |
|            |                                                                                                    | Strongly agree | Agree | Neutral | Disagree | Strongly disagree |
| 305.1      | I provide health education to the parent/guardian/caretaker of every child I manage                |                |       |         |          |                   |

|       |                                                                                                                                                                                              |  |  |  |  |  |
|-------|----------------------------------------------------------------------------------------------------------------------------------------------------------------------------------------------|--|--|--|--|--|
| 305.2 | If I apply all the stages of the IMCI case Management process to all under 5 patients, I will be able to see only a handful of them because of the patient -nurse ratio.                     |  |  |  |  |  |
| 305.3 | If I apply all the stages of the IMCI case management process to all under patients, I would not be able to attend to all other patients who are not under 5s due to the patient-nurse ratio |  |  |  |  |  |

|              |                                                                                                                                |                |       |         |          |                   |
|--------------|--------------------------------------------------------------------------------------------------------------------------------|----------------|-------|---------|----------|-------------------|
| <b>306</b>   | Provide an estimate of time spent on the assessment and treatment of a child using the IMCI case management protocol.          |                |       |         |          |                   |
|              |                                                                                                                                | Strongly agree | Agree | Neutral | Disagree | Strongly disagree |
| 306.1        | I spend more than one hour per patient                                                                                         |                |       |         |          |                   |
| <b>306.2</b> | I spend 30-40 minutes per patient                                                                                              |                |       |         |          |                   |
| <b>306.3</b> | I spend 10-29 minutes per patient                                                                                              |                |       |         |          |                   |
| 306.4        | I spend 1-9 minutes per patient                                                                                                |                |       |         |          |                   |
| <b>307</b>   | Provide an estimate of time spent on the assessment and treatment of a child without using the IMNCI case management protocol. |                |       |         |          |                   |
| <b>307.1</b> | I spend more than one hour per patient                                                                                         |                |       |         |          |                   |
| <b>307.2</b> | I spend 30-40 minutes per patient                                                                                              |                |       |         |          |                   |
| <b>307.3</b> | I spend 10-29 minutes per patient                                                                                              |                |       |         |          |                   |

|              |                               |  |  |  |  |  |
|--------------|-------------------------------|--|--|--|--|--|
| <b>307.4</b> | spend 1-9 minutes per patient |  |  |  |  |  |
|--------------|-------------------------------|--|--|--|--|--|

| 308          | To what extent do you agree with the following statements about IMCI strategy at your health facility?                                                                                         | Strongly agree | Agree | Neutral | Disagree | Strongly disagree |
|--------------|------------------------------------------------------------------------------------------------------------------------------------------------------------------------------------------------|----------------|-------|---------|----------|-------------------|
|              |                                                                                                                                                                                                |                |       |         |          |                   |
| 308.1        | IMNCI has boosted my confidence and skills in Under 5 patient case management.                                                                                                                 |                |       |         |          |                   |
| 308.2        | It has led to longer patient waiting queues because of the time spent to apply all the stages of the IMCI case management protocol per under 5 patients.                                       |                |       |         |          |                   |
| 308.3        | IMNCI is partially implemented because, if the IMCI trained nurses take too long assessing the under 5 patients, non-IMCI trained nurses take over care of other children waiting in the queue |                |       |         |          |                   |
| 308.4        | IMCI has reduced the number of follow-up visits by under 5 patients because of the thorough and accurate case management during initial visit.                                                 |                |       |         |          |                   |
| 308.5        | It is not practical to always refer to the IMCI chart booklet in the clinic during case management of every presentation.                                                                      |                |       |         |          |                   |
| <b>308.6</b> | All IMCI trained nurses at our health facility apply all the stages of the IMCI protocol during case management of children under 5 years.                                                     |                |       |         |          |                   |

|       |                                                                                                                                                                                     |  |  |  |  |  |
|-------|-------------------------------------------------------------------------------------------------------------------------------------------------------------------------------------|--|--|--|--|--|
| 308.7 | Our health facility lay-out does not make it easy for us practice all the IMCI skills like witnessing first dose treatment, rehydration corners etc.                                |  |  |  |  |  |
| 308.8 | The case management practices of IMCI trained nurses and non-IMCI trained nurses are inconsistent; hence caretakers of under5 prefer to be seen by nurses who are not IMCI trained. |  |  |  |  |  |

| 309   |                                                      | Which statement describes your experience in implementing the guidelines and procedures of the IMCI-1 strategy? |       |         |          |                   |
|-------|------------------------------------------------------|-----------------------------------------------------------------------------------------------------------------|-------|---------|----------|-------------------|
|       |                                                      | Strongly agree                                                                                                  | Agree | Neutral | Disagree | Strongly disagree |
| 309.1 | IMCI is a user-friendly strategy for health workers  |                                                                                                                 |       |         |          |                   |
| 309.2 | IMCI is easy to understand and apply                 |                                                                                                                 |       |         |          |                   |
| 309.3 | IMCI protocol is too long                            |                                                                                                                 |       |         |          |                   |
| 309.4 | IMCI protocol is tedious                             |                                                                                                                 |       |         |          |                   |
| 309.5 | IMCI is time-consuming                               |                                                                                                                 |       |         |          |                   |
| 309.6 | IMCI is not practical to use at our health facility  |                                                                                                                 |       |         |          |                   |
| 309.7 | IMCI is difficult to understand and apply            |                                                                                                                 |       |         |          |                   |
| 309.8 | My supervisor does not appreciate rationale for IMCI |                                                                                                                 |       |         |          |                   |

|               |                                                                                             |  |  |  |  |  |
|---------------|---------------------------------------------------------------------------------------------|--|--|--|--|--|
| <b>309.9</b>  | My supervisor is not IMCI-trained                                                           |  |  |  |  |  |
| <b>309.10</b> | Patient-nurse ratio does not allow for the use of IMCI strategy                             |  |  |  |  |  |
| <b>309.11</b> | IMCI guidelines are too simplistic, it undermines my clinical training                      |  |  |  |  |  |
| <b>309.12</b> | IMCI drugs are frequently out of stock                                                      |  |  |  |  |  |
| <b>309.13</b> | Some clinical officers and doctors have negative attitudes towards IMCI                     |  |  |  |  |  |
| <b>309.14</b> | IMCI wall charts and chart booklets are frequently unavailable                              |  |  |  |  |  |
| 309.15        | Lack of IMCI follow-up training by IMCI facilitators                                        |  |  |  |  |  |
| 309.16        | Lack of supervision by IMCI trainers                                                        |  |  |  |  |  |
| 309.17        | Our health facility is not fully equipped to support the use of be IMCI-strategy procedures |  |  |  |  |  |
| 309.18        | Other (please specify :-)                                                                   |  |  |  |  |  |
